# Supplementary material for: Design and Fabrication of Sodium Alginate/Carboxymethyl Cellulose Sodium Blend Hydrogel for Artificial Skin
Source: MDPI journal article supplement (doi:10.3390/gels7030115), 2021-08-09
Supplement: s1 [file s1]

# Design and Fabrication of Sodium Alginate/Carboxymethyl Cellulose Sodium Blend Hydrogel for Artificial Skin

Kun Zhang <sup>1,2</sup>, Yanen Wang <sup>1,2,\*</sup>, Qinghua Wei <sup>1,2,\*</sup>, Xinpei Li <sup>1,2</sup>, Ying Guo <sup>1,2</sup> and Shan Zhang <sup>1,2</sup>

<sup>1</sup> Industry Engineering Department, School of Mechanical Engineering, Northwestern Polytechnical University, Xi'an 710072, China; npu\_zk@sina.com (K.Z.); lixinpei@mail.nwpu.edu.cn (X.L.); guoying0402@sina.com (Y.G.); zhangshanzs33@163.com (S.Z.)

<sup>2</sup> Institute of Medical Research, Northwestern Polytechnical University, Xi'an 710072, China

\* Correspondence: wangyanen@126.com (Y.W.); weiqinghua@nwpu.edu.cn (Q.W.)

† These authors contributed equally to this work and should be considered co-first authors.

## Supplementary Materials

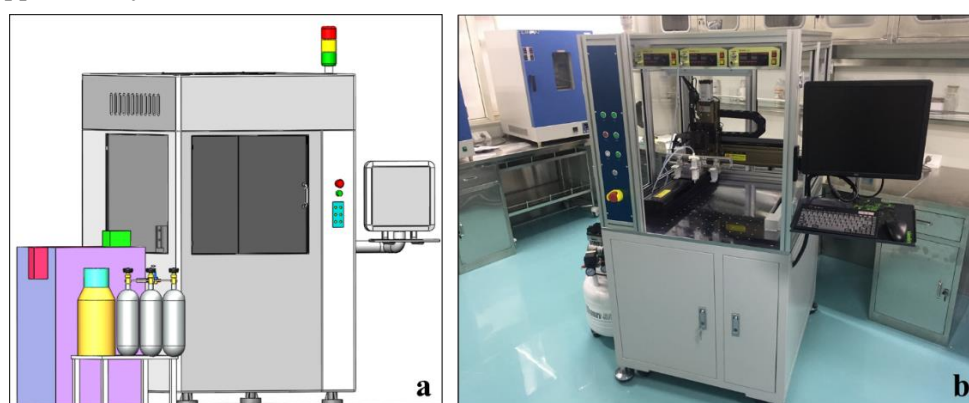

**Figure S1.** (a) Bio-printer control cabinet structure diagram; (b) Bio-printer pneumatic extrusion system

**Citation:** Kun, Z.; Yanen, W.; Qinghua, W.; Ying, G.; Shan, Z. Design and Fabrication of Sodium Alginate/Carboxymethyl Cellulose Sodium Blending Hydrogel for Artificial Skin. *Gels* **2021**, *7*, 115. <https://doi.org/10.3390/gels7030115>

Academic Editor: David Díaz Díaz

Received: 16 July 2021

Accepted: 6 August 2021

Published: 9 August 2021

**Publisher's Note:** MDPI stays neutral with regard to jurisdictional claims in published maps and institutional affiliations.

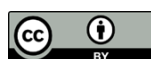

**Copyright:** © 2021 by the authors. Licensee MDPI, Basel, Switzerland. This article is an open access article distributed under the terms and conditions of the Creative Commons Attribution (CC BY) license (<http://creativecommons.org/licenses/by/4.0/>).
